# Supplementary material for: Mitotically-Associated lncRNA (MANCR) Affects Genomic Stability and Cell Division in Aggressive Breast Cancer
Source: Oxford University Press journal article supplement (doi:10.1158/1541-7786.mcr-17-0548), 2018-01-29
Supplement: 15417786mcr170548-sup-190005_2_supp_4466691_p1bx4b.xlsx [file 15417786mcr170548-sup-190005_2_supp_4466691_p1bx4b.xlsx]

## Sheet: Sheet1
Supplemental Table 1. RT-qPCR primer sequences. Table consists of gene ids and oligonucleotide sequences for RT-qPCR primers.
Gene ID	Sequence 5'-> 3'
HsCDH1_F	CCTGGGACTCCACCTACAGA
HsCDH1_R	TGGATTCCAGAAACGGAGGC
HsRUNX2_F	CAGCCCCAACTTCCTGTG
HsRUNX2_r	CCGGAGCTCAGCAGAATAAT
HsCENPP_F	GAAGTCCCGAGTCCAAAAATCT
HsCENPP_R	TGATGCCAGTAAGCGTACTTAGA
HsLAMP3_F	ACTACCCCAGCGACTACAAAA
HsLAMP3_R	CTAGGGCCGACTGTAACTTCA
HsRAD51B_F	CAGAGTCTGCATTTAGTGCTGA
HsRAD51B_R	ACAGGTGAGTTCCCGATAAAGAT
HsFAS_F	TCTGGTTCTTACGTCTGTTGC
HsFAS_R	CTGTGCAGTCCCTAGCTTTCC
HsBIRC5_F	AGGACCACCGCATCTCTACA
HsBIRC5_R	TTTCCTTTGCATGGGGTCGT
HsCDKN1A_F	GGAAGACCATGTGGACCTGT
HsCDKN1A_R	GGCGTTTGGAGTGGTAGAAA
HsITGB2_F	GGAACAGGAAGTGTCAGGACTT
HsITGB2_R	AGCATGTCCCTCGGTGTGC
HsBAX_F	GCTGCAGAGGATGATTGC
HsBAX_R	GGCCCCAGTTGAAGTTGC
HsPDGFRB_F	AGACACGGGAGAAATACTTTTGC
HsPDGFRB_R	AGTTCCTCGGCATCATTAGGG
HsROCK1_F	CCCCTCGAACGCTTTCTACA
HsROCK1_R	GGGCACTCAGTCACATGGTT
HsGADPH_F	ATGTTCGTCATGGGTGTGAA
HsGADPH_R	TGTGGTCATGAGTCCTTCCA
HsACTB_F	AGCACAGAGCCTCGCCTTT
HsACTB_R	CGGCGATATCATCATCCAT
HsMANCR_F	TGTTGGAGGATACCTGTGCAT
HsMANCR_R	TGCCATTCCCAGATTGTGGAG
